# Supplementary material for: Landscape Ecology and Epidemiology of Malaria Associated with Rubber Plantations in Thailand: Integrated Approaches to Malaria Ecotoping
Source: Hindawi journal article supplement (doi:10.1155/2015/909106), 2015-01-01
Supplement: f1 [file 909106.f1.pdf]

**Table S1 Current status of land use\* among five regions of Thailand, 2009-2012**

| Land use type                        | North             | Northeast          | Central           | East              | South             |
|--------------------------------------|-------------------|--------------------|-------------------|-------------------|-------------------|
| <b>Agricultural land</b>             | 6,368.6<br>(37.5) | 11,415.1<br>(67.6) | 3,425.6<br>(49.3) | 2,148.5<br>(62.5) | 4,192.9<br>(59.3) |
| Paddy field                          | 2,626.8           | 7,340.8            | 1,424.1           | 487.7             | 381.9             |
| Field crop                           | 2,034.6           | 2,602.1            | 1,078.1           | 556.0             | 2.9               |
| Perennial <sup>a</sup>               | 400.5             | 1,164.5            | 264.1             | 638.6             | 3,310.7           |
| Orchard                              | 569.2             | 188.2              | 357.4             | 319.7             | 404.5             |
| Horticulture                         | 37.3              | 23.6               | 72.6              | 4.1               | 3.9               |
| Swidden cultivation                  | 652.7             | 0                  | 0                 | 0                 | 0                 |
| Pasture and farm house               | 32.2              | 71.5               | 29.1              | 15.4              | 1.9               |
| Aquatic plant                        | 0.1               | 0.1                | 2.0               | 0.1               | 0.1               |
| Aquaculture land                     | 12.0              | 20.7               | 198.2             | 126.9             | 86.8              |
| Integrated farm/<br>Diversified farm | 3.2               | 3.6                | 0                 | 0                 | 0.2               |
| <b>Forest land</b>                   | 9,266.8<br>(54.6) | 3,148.5<br>(18.7)  | 2,385.5<br>(34.3) | 788.0<br>(22.9)   | 2,062.7<br>(29.2) |
| Perennial forest                     | 617.3             | 2,272.5            | 404.0             | 744.6             | 198.8             |
| Disturbed forest                     | 8,649.5           | 876.0              | 1,981.5           | 43.4              | 1,863.9           |
| <b>Urban and built-up land</b>       | 602.6<br>(3.6)    | 868.3<br>(5.1)     | 617.2<br>(8.9)    | 235.3<br>(6.8)    | 265.6<br>(3.7)    |
| <b>Water bodies</b>                  | 228.9<br>(1.4)    | 562.6<br>(3.3)     | 232.5<br>(3.3)    | 84.5<br>(2.5)     | 296.2<br>(4.2)    |
| <b>Miscellaneous land</b>            | 497.5<br>(2.9)    | 890.9<br>(5.3)     | 291.3<br>(4.2)    | 181.8<br>(5.3)    | 254.2<br>(3.6)    |
| Others                               | 451.6             | 752.7              | 254.1             | 160.4             | 203.4             |
| Marsh and swamp                      | 45.9              | 138.2              | 37.2              | 21.4              | 50.8              |
| <b>Total</b>                         | 16,964.4          | 16,885.4           | 6,952.1           | 3,438.1           | 7,071.6           |

\*Land area in hectares (ha x 1000) and percent of land area in relation to land use type in parentheses are shown. With respect to land cover classification system (LLCS) available at <http://www.fao.org>, the levels I to III land use information were adapted from the Land Development Department, Ministry of Agriculture and Cooperatives available at <http://www.ddd.go.th/>.

<sup>a</sup>Perennial agriculture including mixed perennial grains/oil seeds/legumes/forages/trees can exploit the benefits from both upland and lowland intensification of rubber tree, oil palm, eucalyptus, teak, coffee, tea, mulberry, bamboo, kapok, betal palm, rain tree, and so on.
